# Supplementary material for: Electrochemical Investigation of Ofloxacin Using a Functionalized Multi-Walled Carbon Nanotube Paste Electrode
Source: Research Square preprint supplement (doi:10.21203/rs.3.rs-6580404/v1), 2025-05-27
Supplement: Supplementary file 1 [file 65fe190e96190c0080a8ab1d.docx]

**Highlights**

- A functionalized multi-walled carbon nanotube (MWCNT)-based paste electrode is proposed for the electrochemical detection of ofloxacin.
- The functionalization of MWCNTs significantly enhances the electrode's electrochemical performance, improving sensitivity and selectivity for ofloxacin detection.
- The sensor's performance was evaluated using cyclic voltammetry, differential pulse voltammetry, and electrochemical impedance spectroscopy, demonstrating high reproducibility and stability.
- The sensor shows potential for detecting ofloxacin in pharmaceutical and environmental samples, offering a rapid and reliable analytical tool.
- The study provides valuable insights for the monitoring of ofloxacin levels in both clinical and environmental contexts.
